# Supplementary material
Source: publisher figshare collection journal article supplement (https://acs.figshare.com/ndownloader/files/18022877)
Supplement: Supplementary file 1 [file 18022877]

## **A Selectivity Study of FFAR4/FFAR1 Agonists by Molecular Modeling**

Xiangying Zhang, Hongbin Sun, Xiaoan Wen\* and Haoliang Yuan\*

*Jiangsu Key Laboratory of Drug Discovery for Metabolic Disease and State Key  
Laboratory of Natural Medicines, China Pharmaceutical University, Nanjing 210009,  
P.R. China*

\*Corresponding Author.

Tel.: +86-25-83271050; Fax: +86-25-83271050.

Email: wxagj@126.com (X. W.) and yhl@cpu.edu.cn (H. Y.)

### **Table of Contents**

|                                                                |   |
|----------------------------------------------------------------|---|
| <b>1. Figure S1</b> Sequence alignment for homology model..... | 2 |
|----------------------------------------------------------------|---|

---

|           |                   |                     |                   |                   |                    |
|-----------|-------------------|---------------------|-------------------|-------------------|--------------------|
| 6IBL      | AKVMSLLMAL        | VVLLIVAGNV          | LVIAAIGSTQ        | RLQTLTNLFI        | TSLACADLVV         |
| FFAR4     | AAVETTVLV         | IFAVSLLGNV          | CALVLVARRR        | RRGA-TACL         | LNLFCADLLF         |
| 6IBL      | GLLVVPFGAT        | LVVRGTWLWG          | SFLCELWTS         | DVLCVTASIE        | TLCVIAIDRY         |
| FFAR4     | -ISAIPVLVA        | V <b>RWTE</b> AWLLG | PVACHLLFYV        | MTLSGSVTIL        | TAAVSLERM          |
| 6IBL      | LAITSPFRYQ        | SLMTRARAKV          | IICTVWAISA        | LVSFLPIMMH        | WWRDEDPOAL         |
| FFAR4     | VCIV-----         | ----RARA-V          | LLALINGYSA        | VAA-LPLCV-        | FFR <b>VVPQRLP</b> |
| 6IBL      | KCYQDPGCCD        | FVT-----NR          | AYAIASSIIS        | FYIPLLIMIF        | VYLRVYREAK         |
| FFAR4     | <b>GADQEISICT</b> | <b>LIWPTIPGEI</b>   | SWDVSFVTLN        | FLVPGLVIVI        | SYSKILQITK         |
| 6IBL      | EQIRKIDRAS        | -----AM             | KEHKALKTLG        | IIMGVFTLCW        | LPFFLVNIIVN        |
| FFAR4     | ASRKRLTVS-        | -----               | QDFRLFRTL         | LLMVSFFIMW        | SPIIITILLI         |
| 6IBL      | VFNRLVDPDW        | LFVAFNWLG           | ANSAMNPITY        | CRSPDFRKAF        | KRLLA              |
| FFAR4     | <b>LIQN-----</b>  | <b>LFFWVVAFTF</b>   | <b>ANSALNPILY</b> | <b>NMTLCRNEWK</b> | <b>KIFCCF</b>      |
| 4XES      | LLAIPMTMGL        | QNRSADGTHP          | GGLVCTPIVD        | TATVKVVIQV        |                    |
| FFAR4ECL2 | -----V            | <b>PQRLP-GADQ</b>   | <b>EISICTLIWP</b> | <b>T-----</b>     |                    |

**Figure S1.** Sequence alignment from Ala40 to Phe337 for homology modeling. Background color indicated similarity, dark-cyan for identity, blue for high similarity and cyan for low similarity. White indicated no similarity. Arg99-Ala103 were marked in red, residues in ECL2 were marked in magenta.
